# Supplementary material
Source: PubMed Central journal article supplement (PMC2000822)
Supplement: NIHMS20609-supplement-01.pdf [file NIHMS20609-supplement-01.pdf]

Supplemental Material 2. Raw Data for Figure 5 (Frequencies of MSI-H and CIMP-high in Tumors with Various Combined p53/p27 Status)

| p53            | p27<br>Cytoplasmic | p27<br>Nuclear | MSI-H                | CIMP-high            |
|----------------|--------------------|----------------|----------------------|----------------------|
| Positive       | Positive           | Any            | 2.5% (5/202)         | 7.7% (15/196)        |
|                |                    | Any            | 11% (18/168)         | 14% (23/168)         |
|                | Negative           | Loss           | 10% (8/77)           | 16% (12/77)          |
|                |                    | 1+             | 12% (8/67)           | 11% (7/66)           |
|                |                    | 2+             | 8.3% (2/24)          | 16% (4/25)           |
| Positive total |                    |                | 6.2% (23/370)        | 10% (38/364)         |
| Negative       | Positive           | Any            | <b>7.2% (14/195)</b> | <b>5.6% (11/195)</b> |
|                |                    | Any            | <b>32% (88/278)</b>  | <b>31% (83/269)</b>  |
|                | Negative           | Loss           | <b>39% (61/158)</b>  | <b>37% (57/153)</b>  |
|                |                    | 1+             | 17% (15/86)          | 15% (12/82)          |
|                |                    | 2+             | <b>35% (12/34)</b>   | <b>41% (14/34)</b>   |
| Negative total |                    |                | 22% (102/473)        | 20% (94/464)         |

Abbreviations: CIMP, CpG island methylator phenotype; MSI, microsatellite instability.
