# Supplementary material
Source: PubMed Central journal article supplement (PMC2000822)
Supplement: NIHMS20609-supplement-02.pdf [file NIHMS20609-supplement-02.pdf]

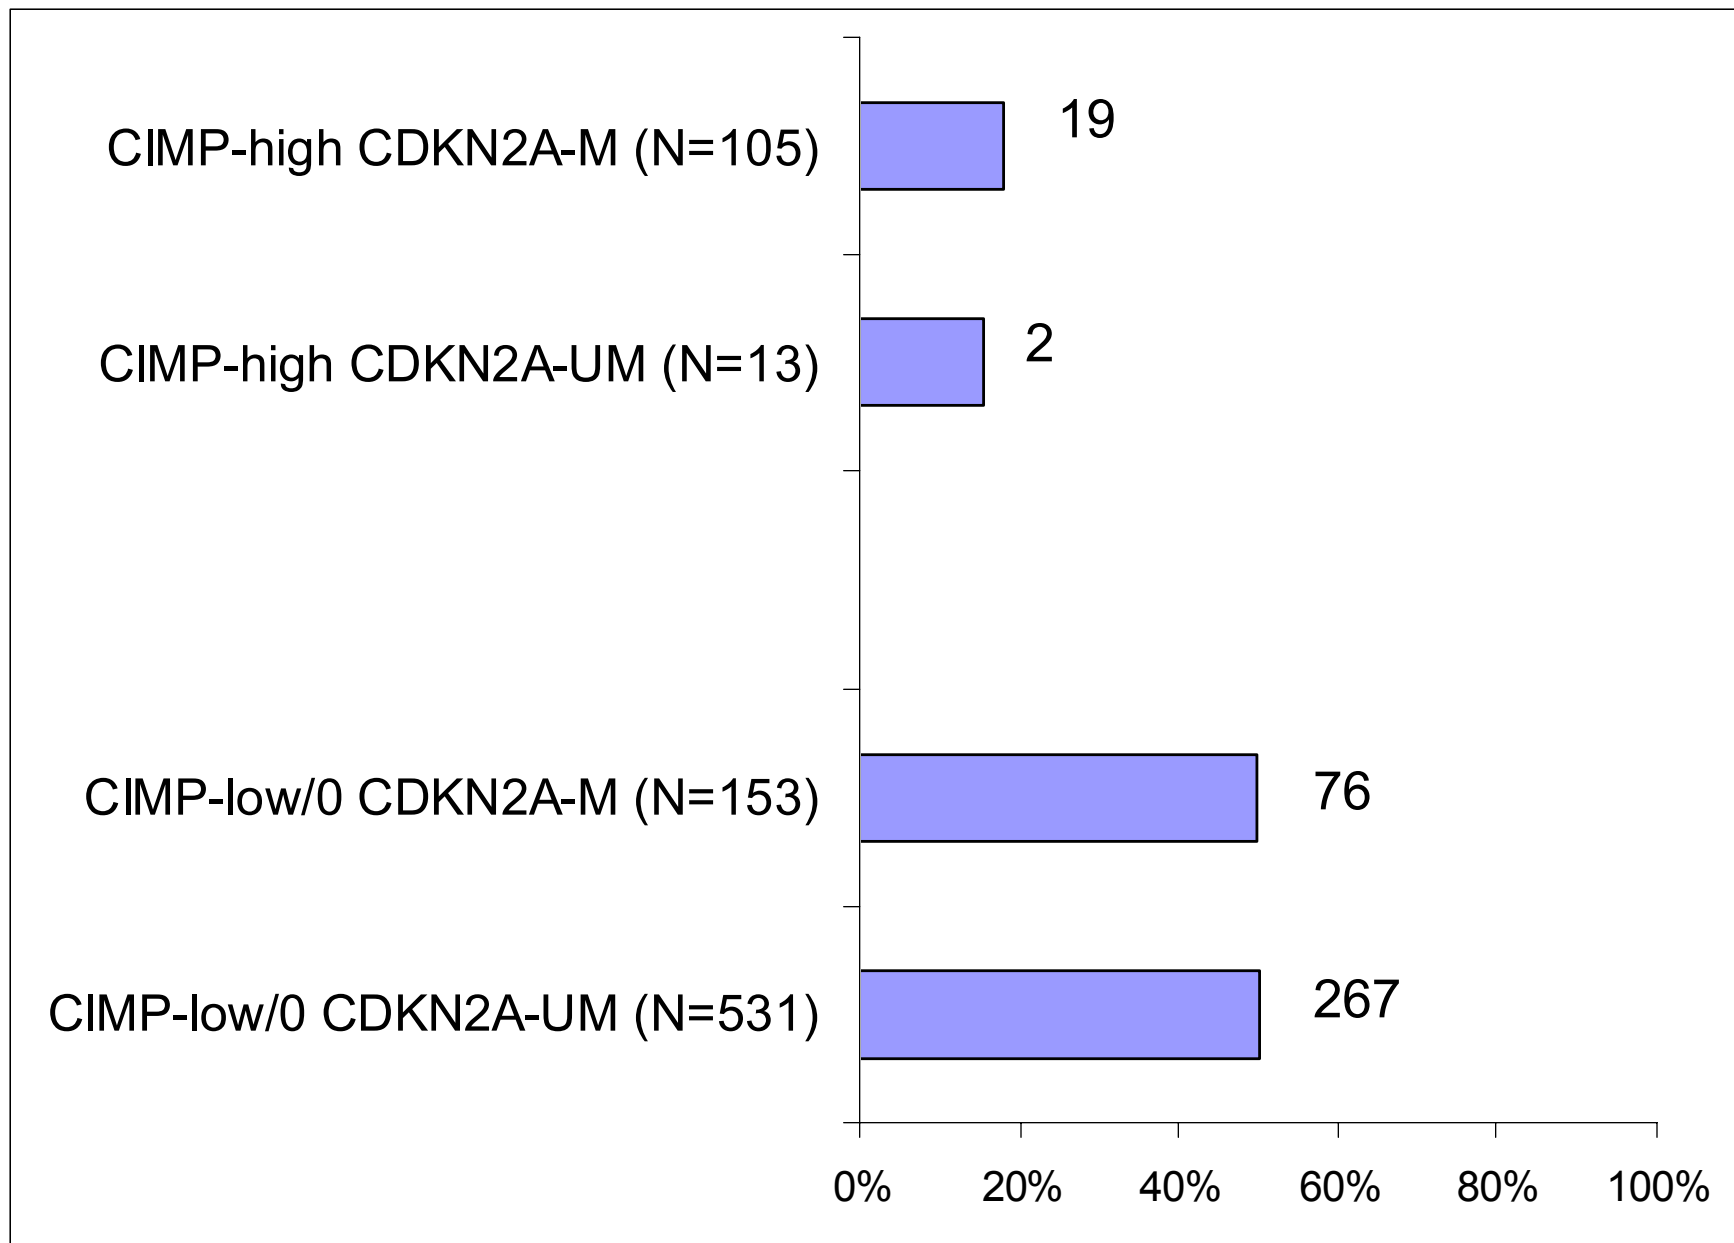

Supplemental Material 1. Frequency of cytoplasmic p27+ in various CIMP/CDKN2A status of colorectal cancer
